# Supplementary material for: Wild-type menin is rapidly degraded via the ubiquitin-proteasome pathway in a rat insulinoma cell line
Source: PubMed Central journal article supplement (PMC6822493; doi:10.1042/bsr20190471), 2019-10-18
Supplement: BSR-2019-0471_supp.pdf [file BSR-2019-0471_supp.pdf]

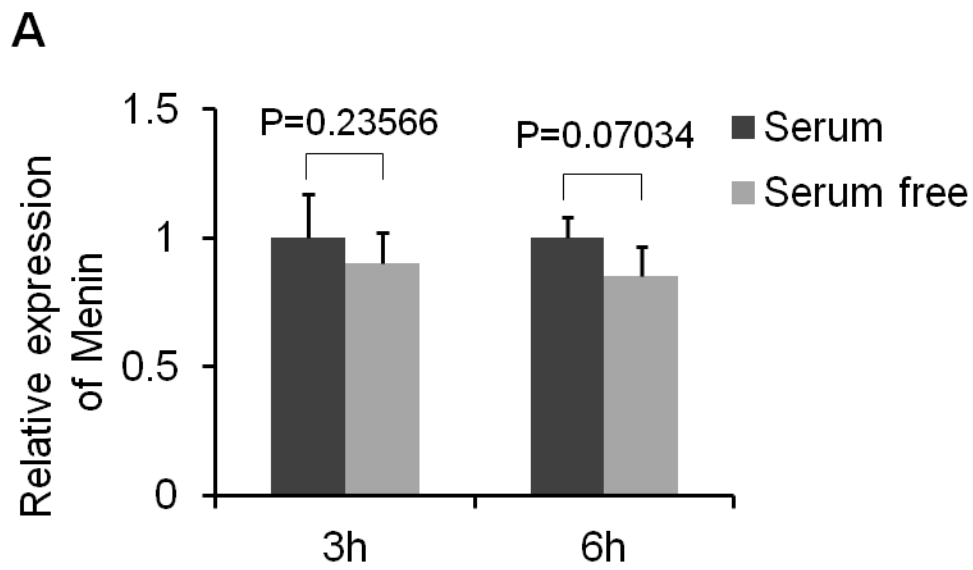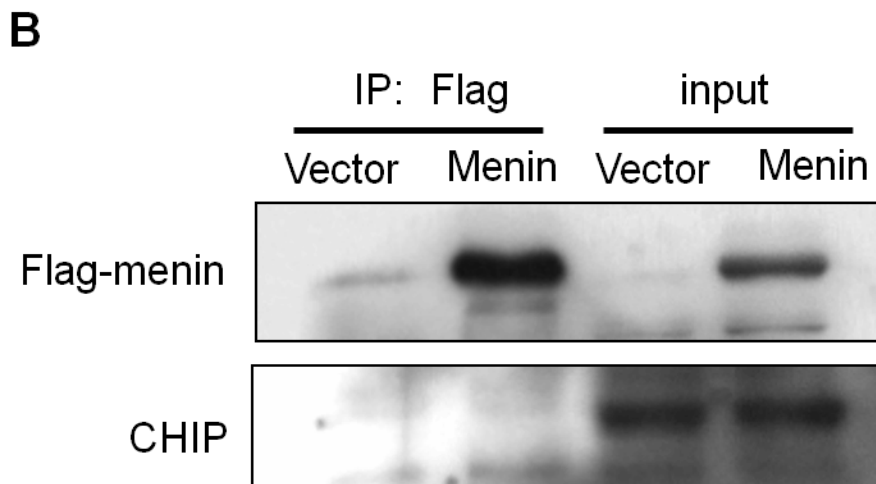

**Supplemental Figure legend**

**Figure 1A.** INS-1 cells were treated with cycloheximide (20 $\mu$ g/ml) for indicated time and lysed for qRT-PCR to detect the mRNA level of *MEN1* gene.

**Figure 1B.** INS-1 cells expressing ectopic Flag-menin were treated with MG132 (20  $\mu$ mol) for 4 h and lysed for IP and Western blot with the indicated antibodies.
